# Supplementary material for: Epidemiologic Relationships Between A1C and All-Cause Mortality During a Median 3.4-Year Follow-up of Glycemic Treatment in the ACCORD Trial
Source: PubMed Central journal article supplement — Diabetes Care. 2010 May;33(5):983–90. doi: 10.2337/dc09-1278 (PMC2858202; doi:10.2337/dc09-1278), 2010-05

**Figure A1.** Time course of A1c control (above) and mortality (below) in the treatment groups. Median A1c values at baseline and at yearly intervals are shown. Rates of mortality from all causes are shown; values at each year represent all experience for the prior year of treatment. The bold line represents the intensive strategy group, the intermediate line the standard group, and the finer line the whole population. Numbers of participants active at each time-point in each treatment group are shown at the bottom of the upper graph.

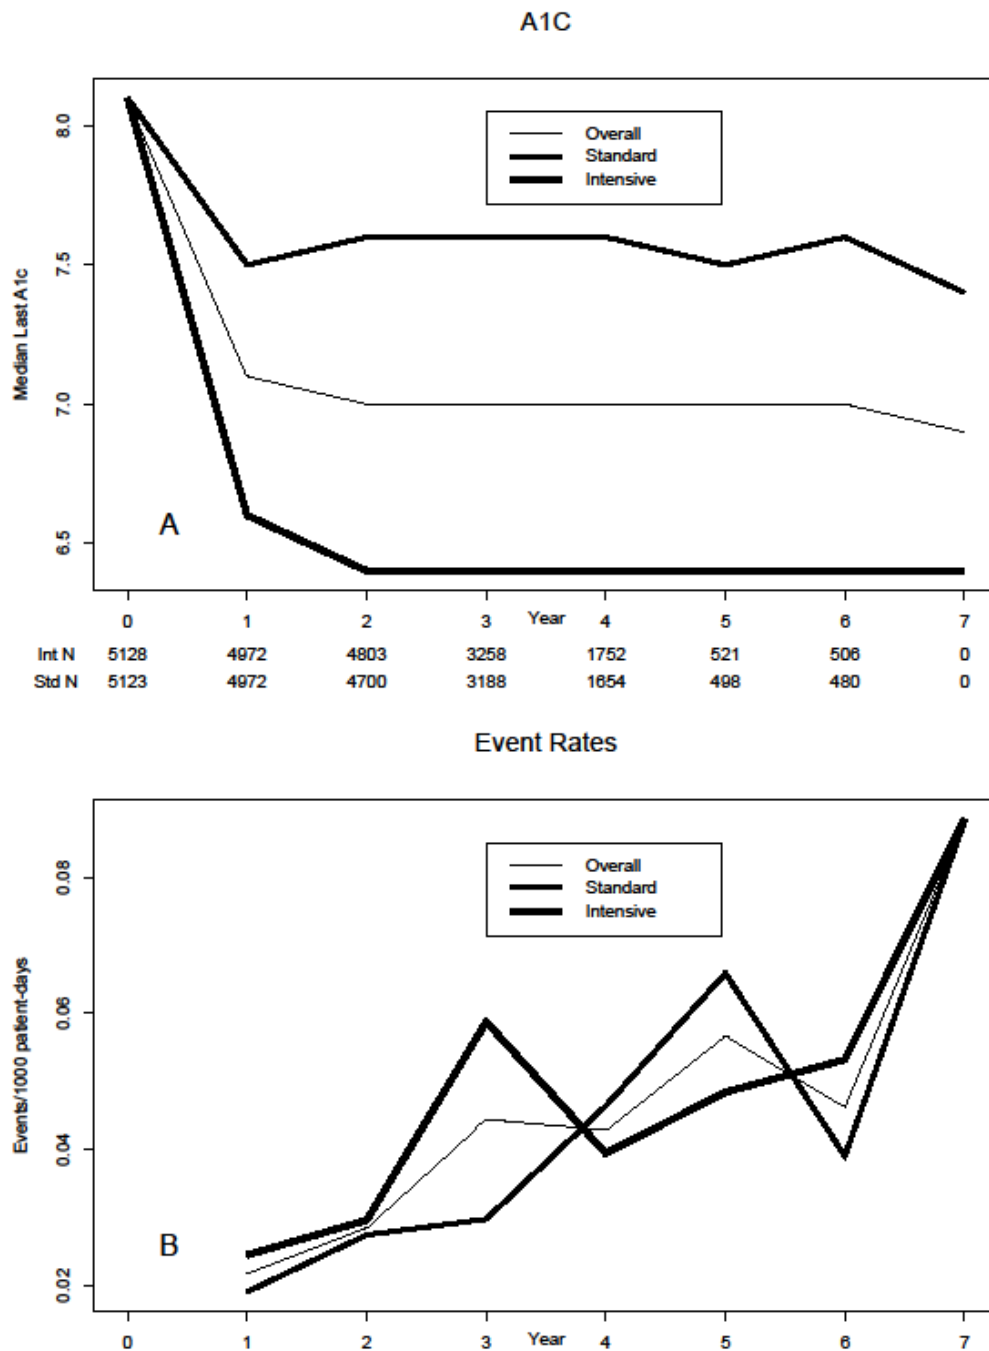

**Figure A2.** Frequency of occurrence of average A1c values over the full range observed at the time of all visits (A and B) and at the time of visits before CV (C and D) and non-CV death (E and F) for participants with each treatment strategy.

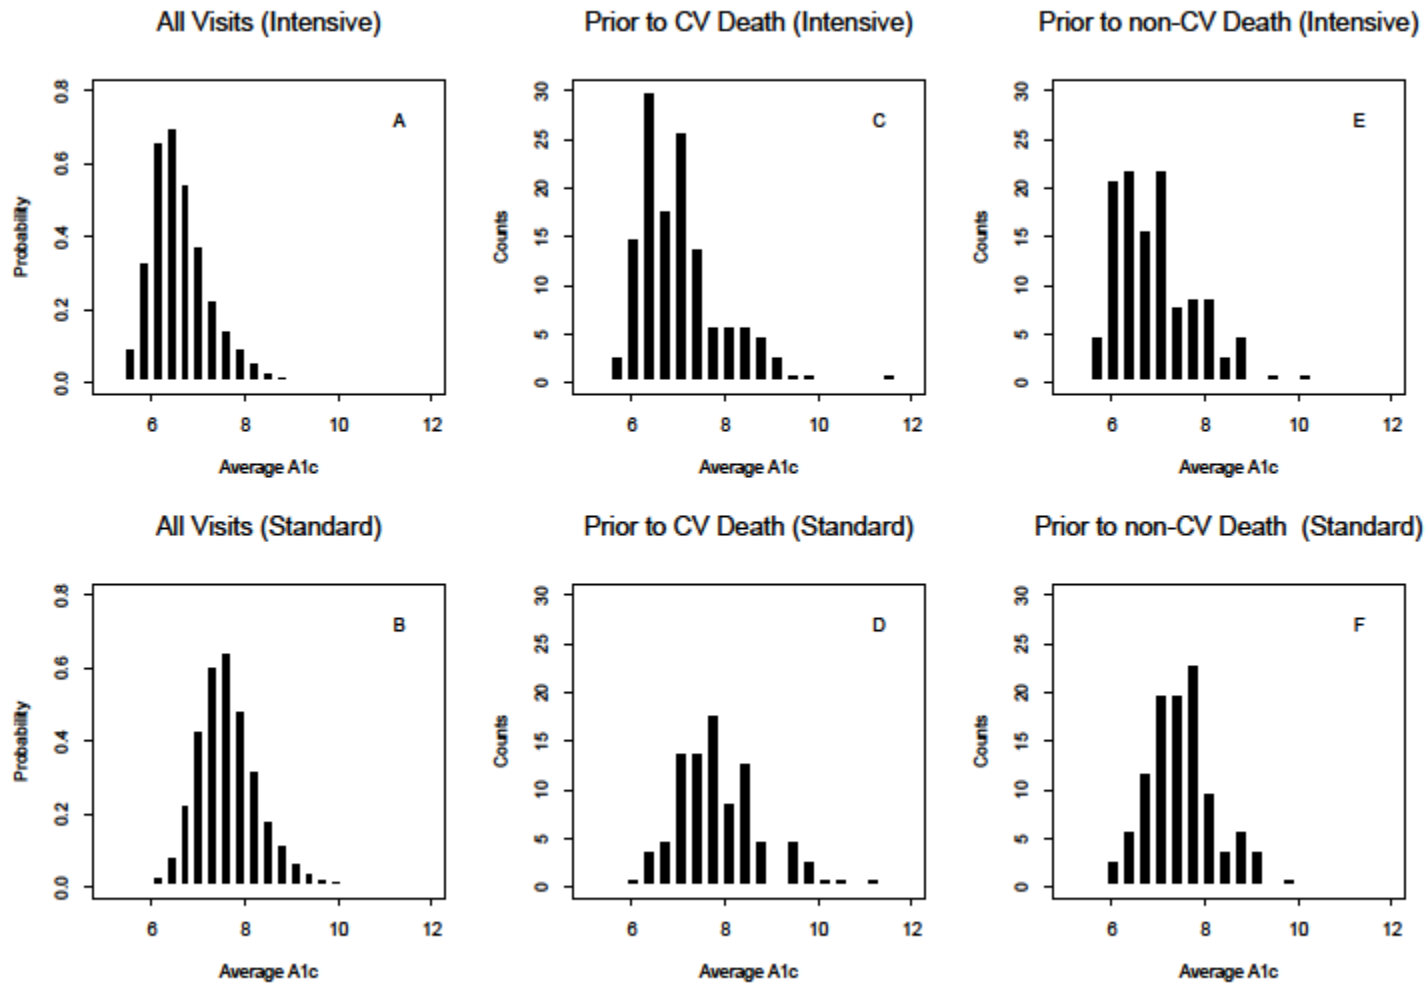

Supplement: supp_dc09-1278_onlineappendix.pdf [file supp_dc09-1278_onlineappendix.pdf]
